# Supplementary material for: Refining the Genomic Region Containing a Major Locus Controlling Fruit Maturity in Peach
Source: PubMed Central journal article supplement (PMC6525192; doi:10.1038/s41598-019-44042-4), 2019-05-17
Supplement: 41598_2019_44042_MOESM1_ESM.pdf [file 41598_2019_44042_MOESM1_ESM.pdf]

# **Refining the Genomic Region Containing a Major Locus Controlling Fruit Maturity in Peach**

Elsadr H.<sup>1</sup>, Sherif S.<sup>2</sup>, Banks T.<sup>3</sup>, Somers D.<sup>3</sup>, and Jayasankar S.<sup>1</sup>

<sup>1</sup>University of Guelph, Department of Plant Agriculture, Ontario, Canada

<sup>2</sup>Alson H. Smith Jr. Agricultural Research and Extension Center, Virginia Tech, Winchester, Virginia, USA

<sup>3</sup>Vineland Research and Innovation Centre, Department of Plant Agriculture, University of Guelph, Guelph, Ontario, Canada

.

**Corresponding author:** Jayasankar Subramanian

**Address:** University of Guelph, Department of Plant Agriculture.

4890 Victoria Av. N., P.O. Box 7000 Vineland Station, ON, L0R 2E0 Canada

**Telephone:** +1 (905) 562-4141 x134

**Fax:** +1 (905) 562-3413

**E-mail:** [jsubrama@uoguelph.ca](mailto:jsubrama@uoguelph.ca)

# Supplementary Data

**Table S1:** Peach genotypes used in this study and their respective pedigrees

| Accession                 | Pedigree                                                                               | Accession | Pedigree                            |
|---------------------------|----------------------------------------------------------------------------------------|-----------|-------------------------------------|
| Allstar                   | Fayette x Newhaven                                                                     | V99131    | Harson x o.p.                       |
| Blazingstar               | Fayette x Newhaven                                                                     | V99141    | Harrow Fair x Emilia                |
| Bounty                    | [(Halberta x o.p.) x Redskin] x (Loring x [(Hiley x Fireglow) x Fireglow] x Fireglow]) | V99161    | Harrow Fair x KV930455              |
| Coralstar                 | Fayette x Newhaven                                                                     | V99171    | Harrow Fair x o.p.                  |
| Desiree                   | Garnet Beauty x Sentry                                                                 | V99221    | Jerseyglo x Emilia                  |
| Garnet Beauty             | Redhaven mutation                                                                      | V99231    | Jerseyglo x HW268                   |
| Gloria                    | NJ304 x J19-19-862144                                                                  | V99232    | Jerseyglo x HW268                   |
| Glowing Star              | Fayette x Newhaven                                                                     | V99241    | Jerseyglo x o.p.                    |
| H.Beauty                  | Cresthaven x Harken                                                                    | V99242    | Jerseyglo x o.p.                    |
| H.Diamond                 | Redskin x Harbinger                                                                    | V99261    | HW268 x KV930455                    |
| Harson                    | Redskin x Sunhaven                                                                     | V99262    | HW268 x KV930455                    |
| HW261                     | Cresthaven x H4219                                                                     | V99263    | HW268 x KV930455                    |
| HW268                     | HW206 x o.p.                                                                           | V993110   | Vinegold x V92131                   |
| HW269                     | Cresthaven x SH-450                                                                    | V99316    | Vinegold x V92131                   |
| HW271                     | Vollie x HW224                                                                         | V99321    | Vinegold x V84101                   |
| HW272                     | HW225 x H6744005                                                                       | V99322    | Vinegold x V84101                   |
| HW273                     | Biscoe x SH-415                                                                        | V99323    | Vinegold x V84101                   |
| HW274                     | Redskin x Harrow Diamond                                                               | V99325    | Vinegold x V84101                   |
| HW275                     | H243 x Harrow Diamond                                                                  | V99326    | Vinegold x V84101                   |
| HW276                     |                                                                                        | V99351    | HW271 x V88272                      |
| KV930455 (Crimson Rocket) | KV881465 x MA6-1-90                                                                    | V99352    | HW271 x V88272                      |
| Messina                   | D90-9 x NJ318                                                                          | V99371    | V88272 x HW271                      |
| NJF15                     | B7-6-151-752080 x NJF7                                                                 | V99372    | V88272 x HW271                      |
| NJF16                     | A43-143-782081 x NJF4                                                                  | V99381    | V88272 x White Lady                 |
| NJF18                     | H15-20-90258 x A34-160-782118                                                          | V99382    | V88272 x White Lady                 |
| Redstar                   | Newhaven x o.p.                                                                        | V99383    | V88272 x White Lady                 |
| Risingstar                | Newhaven x Jim Dandee                                                                  | V99384    | V88272 x White Lady                 |
| Starfire                  | Fayette x Newhaven                                                                     | V99385    | V88272 x White Lady                 |
| Sweet-N-Up                | KV882304 x BO87021003                                                                  | V99391    | V88272 x o.p.                       |
| V200072                   | V95013 x Catherina                                                                     | V99392    | V88272 x o.p.                       |
| V200114                   | V950125 x Catherina                                                                    | V99393    | V88272 x o.p.                       |
| V200161                   | HW 261 x V55061                                                                        | V99394    | V88272 x o.p.                       |
| V200171                   | HW 261 x O.P.                                                                          | V99395    | V88272 x O.P.                       |
| V200172                   | HW 261 x O.P.                                                                          | V99396    | V88272 x O.P.                       |
| V203071                   | Venture x KV930278                                                                     | V99401    | Flamina x V85384                    |
| V85221                    | Harrow Diamond x V68101                                                                | V99402    | Flamina x V85384                    |
| V85331                    | Newhaven x Vivid                                                                       | V99403    | Flamina x V85384                    |
| V85384                    | Harrow Beauty x V75012                                                                 | V99404    | Flamina x V85384                    |
| V853914                   | Harrow Beauty x V792502                                                                | V99405    | Flamina x V85384                    |
| V88021                    | Veeglo x Harrow Diamond                                                                | V99406    | Flamina x V85384                    |
| V88063                    | Veeglow x V39071                                                                       | V99407    | Flamina x V85384                    |
| V88261                    | Redhaven x Brighton                                                                    | V99408    | Flamina x V85384                    |
| V88262                    | Redhaven x Brighton                                                                    | V99411    | Flamina x HW268                     |
| V88272                    | PES Redhaven x Sentry                                                                  | V99412    | Flamina x HW268                     |
| V92131                    | V68051 x V790737                                                                       | V99413    | Flamina x HW268                     |
| V92301                    | Harrow Diamond x V790638                                                               | V99414    | Flamina x HW268                     |
| V94021                    | Harson x o.p.                                                                          | V99415    | Flamina x HW268                     |
| V94091                    | Newhaven x V88063                                                                      | V99422    | Flamina x o.p.                      |
| V95191                    | V790638 x Harblaze                                                                     | V99423    | Flamina x o.p.                      |
| V95192                    | V790638 x Harblaze                                                                     | V99431    | Brighton x HW271                    |
| V95241                    | Yumyeong x o.p.                                                                        | V99432    | Brighton x HW271                    |
| V95275                    | V88272 x Yumyeong                                                                      | V99471    | Cresthaven x V85384                 |
| V95276                    | V88272 x Yumyeong                                                                      | V99481    | Cresthaven x Emilia                 |
| V95277                    | V88272 x Yumyeong                                                                      | V99482    | Cresthaven x Emilia                 |
| V95281                    | V88272 x Eden                                                                          | V99483    | Cresthaven x Emilia                 |
| V96151                    | Newhaven x HW106                                                                       | V99491    | Cresthaven x HW268                  |
| V97171                    | Garnet Beauty x Yumyeong                                                               | V99492    | Cresthaven x HW268                  |
| V97211                    | Sentry x H. Diamond                                                                    | V99501    | Cresthaven x HW271                  |
| V97331                    | V92262 x o.p.                                                                          | V99502    | Cresthaven x HW271                  |
| V97381                    | Andross x o.p.                                                                         | V99503    | Cresthaven x HW271                  |
| V98221                    | Harrow Fair x V85384                                                                   | V99504    | Cresthaven x HW271                  |
| V98321                    | H9301117 x open                                                                        | V99511    | Cresthaven x o.p.                   |
| V98331                    | H9301168 x o.p.                                                                        | V99512    | Cresthaven x o.p.                   |
| V99043                    | Harflame x o.p.                                                                        | V99513    | Cresthaven x o.p.                   |
| V99081                    | H. Diamond x SB-17                                                                     | Vivid     | Sunhigh x (Early Halehaven x Envoy) |
| V99121                    | Harson x KV930455                                                                      | Vollie    | Redskin x Kalhaven                  |

**Table S2:** Number of SNPs required to sufficiently detect recombination on each chromosome in the study population

| <b>Chromosome</b> | <b>SNPs Detected from GBS sequencing</b> | <b>Bases at LD Decay</b> | <b>Bases in Genome*</b> | <b>Markers Needed for Association**</b> |
|-------------------|------------------------------------------|--------------------------|-------------------------|-----------------------------------------|
| <b>1</b>          | 3368                                     | 147750                   | 47800000                | 324                                     |
| <b>2</b>          | 2569                                     | 282145                   | 29800000                | 106                                     |
| <b>3</b>          | 1647                                     | 166007                   | 22100000                | 133                                     |
| <b>4</b>          | 2817                                     | 409919                   | 30400000                | 74                                      |
| <b>5</b>          | 1646                                     | 277659                   | 18400000                | 66                                      |
| <b>6</b>          | 2894                                     | 650608                   | 28800000                | 44                                      |
| <b>7</b>          | 1705                                     | 99146                    | 22700000                | 229                                     |
| <b>8</b>          | 1733                                     | 91382                    | 21700000                | 237                                     |
| <b>Average</b>    | 2297                                     | 265577                   | 27712500                | 152                                     |

\*Values taken from Gbrowse (Prunus persica version 2.0.a1 assembly) using the Genome Database for Rosaceae (GDR)

\*\*Values obtained by dividing the number of bases in the genome by the number of bases at LD Decay

**Table S3:** Fruit maturity dates (MD) for the 132 peach accessions used in the GWAS study.

| <b>Lines</b> | <b>MD 2012</b> | <b>MD 2013</b> | <b>MD Average</b> |
|--------------|----------------|----------------|-------------------|
| Allstar      | 234            | 235            | 235               |
| Blazingstar  | 223            | 231            | 227               |
| Bounty       | 226            | 239            | 233               |
| Corelstar    | 231            | 236            | 234               |
| Desiree      | 200            | 217            | 209               |
| G. Beauty    | 205            | 216            | 211               |
| Gloria       | 231            | 242            | 237               |
| Glowing Star | 242            | 244            | 243               |
| H.Beauty     | 235            | 240            | 238               |
| H.Diamond    | 194            | 206            | 200               |
| Harson       | 214            | 228            | 221               |
| HW261        | 217            | 226            | 222               |
| HW268        | 239            | 243            | 241               |
| HW269        | 199            | 204            | 202               |
| HW271        | 216            | 230            | 223               |
| HW272        | 220            | 225            | 223               |
| HW273        | 236            | 241            | 239               |
| HW274        | 199            | 215            | 207               |
| HW275        | 198            | 210            | 204               |

|            |     |     |     |
|------------|-----|-----|-----|
| HW276      | 201 | 212 | 207 |
| KV930455   | 227 | 232 | 230 |
| Messina    | 238 | 247 | 243 |
| NJF15      | 210 | 224 | 217 |
| NJF16      | 215 | 224 | 220 |
| NJF18      | 208 | 222 | 215 |
| Redstar    | 223 | 228 | 226 |
| Risingstar | 207 | 216 | 212 |
| Starfire   | 224 | 231 | 228 |
| Sweet-N-Up | 238 | 243 | 241 |
| V200072    | 261 | 268 | 265 |
| V200114    | 263 | 273 | 268 |
| V200161    | 212 | 228 | 220 |
| V200171    | 210 | 224 | 217 |
| V200172    | 235 | 239 | 237 |
| V203071    | 229 | 238 | 234 |
| V85221     | 193 | 202 | 198 |
| V85331     | 220 | 227 | 224 |
| V85384     | 236 | 242 | 239 |
| V853914    | 208 | 222 | 215 |
| V88021     | 192 | 201 | 197 |
| V88063     | 233 | 234 | 234 |
| V88261     | 207 | 215 | 211 |
| V88262     | 220 | 229 | 225 |
| V88272     | 207 | 220 | 214 |
| V92131     | 222 | 233 | 228 |
| V92301     | 200 | 210 | 205 |
| V94021     | 241 | 244 | 243 |
| V94091     | 208 | 223 | 216 |
| V95191     | 203 | 219 | 211 |
| V95192     | NA  | 227 | 227 |
| V95241     | 235 | 243 | 239 |
| V95275     | 213 | 226 | 220 |
| V95276     | 226 | 235 | 231 |
| V95277     | 221 | 232 | 227 |
| V95281     | 228 | 237 | 233 |
| V96151     | 218 | 225 | 222 |
| V97171     | 233 | 236 | 235 |
| V97211     | 190 | 198 | 194 |
| V97331     | 200 | 214 | 207 |
| V97381     | 246 | 250 | 248 |
| V98221     | 218 | 227 | 223 |
| V98321     | NA  | 216 | 216 |
| V98331     | 220 | 231 | 226 |

|         |     |     |     |
|---------|-----|-----|-----|
| V99043  | 214 | 225 | 220 |
| V99081  | 205 | 221 | 213 |
| V99121  | 216 | 224 | 220 |
| V99131  | 216 | 231 | 224 |
| V99141  | 242 | 248 | 245 |
| V99161  | 227 | 234 | 231 |
| V99171  | 202 | 217 | 210 |
| V99221  | NA  | 252 | 252 |
| V99231  | 240 | 245 | 243 |
| V99232  | 242 | 250 | 246 |
| V99241  | 241 | 245 | 243 |
| V99242  | 238 | 239 | 239 |
| V99261  | 221 | 232 | 227 |
| V99262  | 226 | 235 | 231 |
| V99263  | 244 | 253 | 249 |
| V993110 | 216 | 226 | 221 |
| V99316  | 217 | 226 | 222 |
| V99321  | 212 | 224 | 218 |
| V99322  | 206 | 219 | 213 |
| V99323  | 211 | 222 | 217 |
| V99325  | 207 | 221 | 214 |
| V99326  | 208 | 220 | 214 |
| V99351  | 207 | 217 | 212 |
| V99352  | 204 | 217 | 211 |
| V99371  | 200 | 220 | 210 |
| V99372  | 201 | 215 | 208 |
| V99381  | 204 | 215 | 210 |
| V99382  | 219 | NA  | 219 |
| V99383  | 207 | 218 | 213 |
| V99384  | 212 | 220 | 216 |
| V99385  | 207 | 218 | 213 |
| V99391  | 191 | 201 | 196 |
| V99392  | 205 | 219 | 212 |
| V99393  | 203 | 218 | 211 |
| V99394  | 202 | 219 | 211 |
| V99395  | 201 | 217 | 209 |
| V99396  | 202 | 216 | 209 |
| V99401  | 263 | 269 | 266 |
| V99402  | 255 | 271 | 263 |
| V99403  | 262 | 272 | 267 |
| V99404  | 251 | 262 | 257 |
| V99405  | 261 | 270 | 266 |
| V99406  | NA  | 270 | 270 |
| V99407  | NA  | 272 | 272 |

|        |     |     |     |
|--------|-----|-----|-----|
| V99408 | NA  | 272 | 272 |
| V99411 | 252 | 258 | 255 |
| V99412 | 244 | 247 | 246 |
| V99413 | 243 | 253 | 248 |
| V99414 | 245 | 261 | 253 |
| V99415 | 256 | 267 | 262 |
| V99422 | 255 | 262 | 259 |
| V99423 | 207 | 221 | 214 |
| V99431 | 201 | 216 | 209 |
| V99432 | 206 | 217 | 212 |
| V99471 | 244 | 250 | 247 |
| V99481 | 253 | 261 | 257 |
| V99482 | 221 | 235 | 228 |
| V99483 | 232 | 234 | 233 |
| V99491 | 246 | 252 | 249 |
| V99492 | 243 | 245 | 244 |
| V99501 | 215 | 226 | 221 |
| V99502 | 245 | 251 | 248 |
| V99503 | 213 | 226 | 220 |
| V99504 | 242 | 246 | 244 |
| V99511 | 247 | 250 | 249 |
| V99512 | 243 | 247 | 245 |
| V99513 | 243 | 250 | 247 |
| Vivid  | 221 | 233 | 227 |
| Vollie | 227 | 240 | 234 |

**Table S4:** Fruit developing periods (FDP) for the 132 peach accessions used in the GWAS study.

| <b>Lines</b> | <b>FMD<br/>2012</b> | <b>FMD<br/>2013</b> | <b>FMD Average</b> |
|--------------|---------------------|---------------------|--------------------|
| Allstar      | 126                 | 111                 | 119                |
| Blazingstar  | 115                 | 107                 | 111                |
| Bounty       | 120                 | 116                 | 118                |
| Corelstar    | 126                 | 113                 | 120                |
| Desiree      | 93                  | 92                  | 93                 |
| G. Beauty    | 97                  | 92                  | 95                 |
| Gloria       | 120                 | 114                 | 117                |
| Glowing Star | 132                 | 119                 | 126                |
| H.Beauty     | 127                 | 115                 | 121                |
| H.Diamond    | 86                  | 80                  | 83                 |
| Harson       | 106                 | 103                 | 105                |
| HW261        | 107                 | 99                  | 103                |

|            |     |     |     |
|------------|-----|-----|-----|
| HW268      | 131 | 118 | 125 |
| HW269      | 90  | 79  | 85  |
| HW271      | 108 | 104 | 106 |
| HW272      | 111 | 99  | 105 |
| HW273      | 128 | 117 | 123 |
| HW274      | 92  | 90  | 91  |
| HW275      | 88  | 83  | 86  |
| HW276      | 94  | 88  | 91  |
| KV930455   | 122 | 109 | 116 |
| Messina    | 133 | 124 | 129 |
| NJF15      | 103 | 99  | 101 |
| NJF16      | 108 | 100 | 104 |
| NJF18      | 101 | 97  | 99  |
| Redstar    | 112 | 102 | 107 |
| Risingstar | 98  | 89  | 94  |
| Starfire   | 116 | 107 | 112 |
| Sweet-N-Up | 132 | 121 | 127 |
| V200072    | 156 | 145 | 151 |
| V200114    | 158 | 150 | 154 |
| V200161    | 106 | 102 | 104 |
| V200171    | 102 | 96  | 99  |
| V200172    | 125 | 110 | 118 |
| V203071    | 121 | 113 | 117 |
| V85221     | 85  | 77  | 81  |
| V85331     | 109 | 103 | 106 |
| V85384     | 129 | 118 | 124 |
| V853914    | 101 | 98  | 100 |
| V88021     | 84  | 76  | 80  |
| V88063     | 123 | 109 | 116 |
| V88261     | 99  | 91  | 95  |
| V88262     | 110 | 103 | 107 |
| V88272     | 99  | 95  | 97  |
| V92131     | 114 | 108 | 111 |
| V92301     | 93  | 85  | 89  |
| V94021     | 135 | 120 | 128 |
| V94091     | 99  | 98  | 99  |
| V95191     | 97  | 95  | 96  |
| V95192     | NA  | 104 | 104 |
| V95241     | 127 | 116 | 122 |
| V95275     | 106 | 101 | 104 |
| V95276     | 120 | 110 | 115 |
| V95277     | 113 | 106 | 110 |
| V95281     | 121 | 113 | 117 |
| V96151     | 111 | 101 | 106 |

|         |     |     |     |
|---------|-----|-----|-----|
| V97171  | 125 | 111 | 118 |
| V97211  | 82  | 74  | 78  |
| V97331  | 94  | 89  | 92  |
| V97381  | 137 | 126 | 132 |
| V98221  | 111 | 102 | 107 |
| V98321  | NA  | 92  | 92  |
| V98331  | 114 | 107 | 111 |
| V99043  | 107 | 99  | 103 |
| V99081  | 99  | 98  | 99  |
| V99121  | 108 | 98  | 103 |
| V99131  | 110 | 106 | 108 |
| V99141  | 135 | 124 | 130 |
| V99161  | 119 | 109 | 114 |
| V99171  | 96  | 94  | 95  |
| V99221  | NA  | 129 | 129 |
| V99231  | 132 | 119 | 126 |
| V99232  | 137 | 128 | 133 |
| V99241  | 134 | 123 | 129 |
| V99242  | 130 | 114 | 122 |
| V99261  | 114 | 107 | 111 |
| V99262  | 119 | 111 | 115 |
| V99263  | 136 | 127 | 132 |
| V993110 | 108 | 100 | 104 |
| V99316  | 109 | 101 | 105 |
| V99321  | 103 | 96  | 100 |
| V99322  | 99  | 94  | 97  |
| V99323  | 103 | 96  | 100 |
| V99325  | 98  | 96  | 97  |
| V99326  | 101 | 96  | 99  |
| V99351  | 101 | 93  | 97  |
| V99352  | 98  | 93  | 96  |
| V99371  | 93  | 92  | 93  |
| V99372  | 94  | 90  | 92  |
| V99381  | 97  | 91  | 94  |
| V99382  | 112 | NA  | 112 |
| V99383  | 100 | 94  | 97  |
| V99384  | 105 | 96  | 101 |
| V99385  | 100 | 93  | 97  |
| V99391  | 84  | 75  | 80  |
| V99392  | 98  | 95  | 97  |
| V99393  | 95  | 93  | 94  |
| V99394  | 95  | 94  | 95  |
| V99395  | 93  | 92  | 93  |
| V99396  | 94  | 91  | 93  |



|        |     |     |     |
|--------|-----|-----|-----|
| V99401 | 158 | 145 | 152 |
| V99402 | 150 | 147 | 149 |
| V99403 | 157 | 149 | 153 |
| V99404 | 145 | 138 | 142 |
| V99405 | 155 | 147 | 151 |
| V99406 | NA  | 146 | 146 |
| V99407 | NA  | 149 | 149 |
| V99408 | NA  | 149 | 149 |
| V99411 | 146 | 136 | 141 |
| V99412 | 138 | 123 | 131 |
| V99413 | 138 | 129 | 134 |
| V99414 | 137 | 133 | 135 |
| V99415 | 148 | 141 | 145 |
| V99422 | 149 | 139 | 144 |
| V99423 | 101 | 97  | 99  |
| V99431 | 94  | 91  | 93  |
| V99432 | 97  | 89  | 93  |
| V99471 | 138 | 127 | 133 |
| V99481 | 146 | 137 | 142 |
| V99482 | 113 | 109 | 111 |
| V99483 | 126 | 111 | 119 |
| V99491 | 138 | 128 | 133 |
| V99492 | 135 | 120 | 128 |
| V99501 | 108 | 101 | 105 |
| V99502 | 137 | 127 | 132 |
| V99503 | 107 | 102 | 105 |
| V99504 | 134 | 120 | 127 |
| V99511 | 138 | 126 | 132 |
| V99512 | NA  | 119 | 119 |
| V99513 | 134 | 124 | 129 |
| Vivid  | 114 | 109 | 112 |
| Vollie | 119 | 115 | 117 |

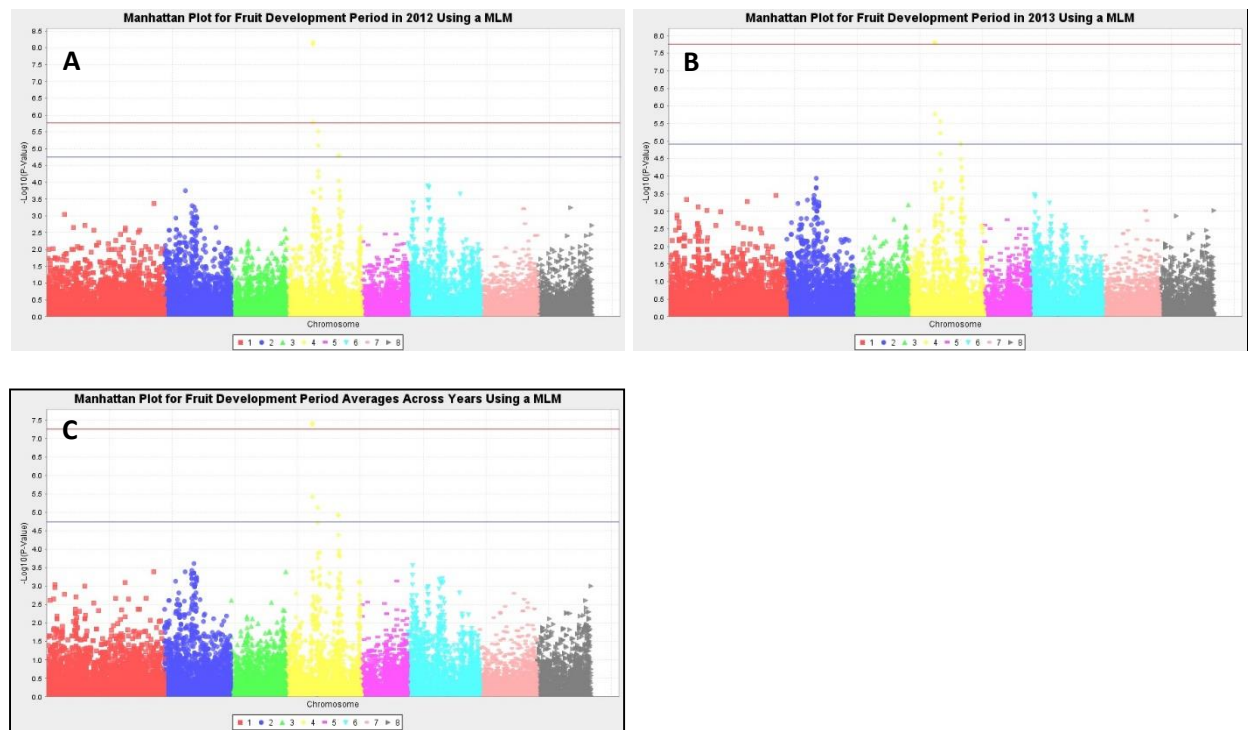

**Fig S1.** Manhattan plots for fruit development period best linear unbiased predictors (BLUPs) (A) in 2012 using a MLM, (B) in 2013 using a MLM and (C) averages across years using a MLM. Red and blue lines represent significance thresholds at  $P < 0.01$  and  $P < 0.05$ , respectively using a Benjamini-Hochberg false discovery rate adjustment.

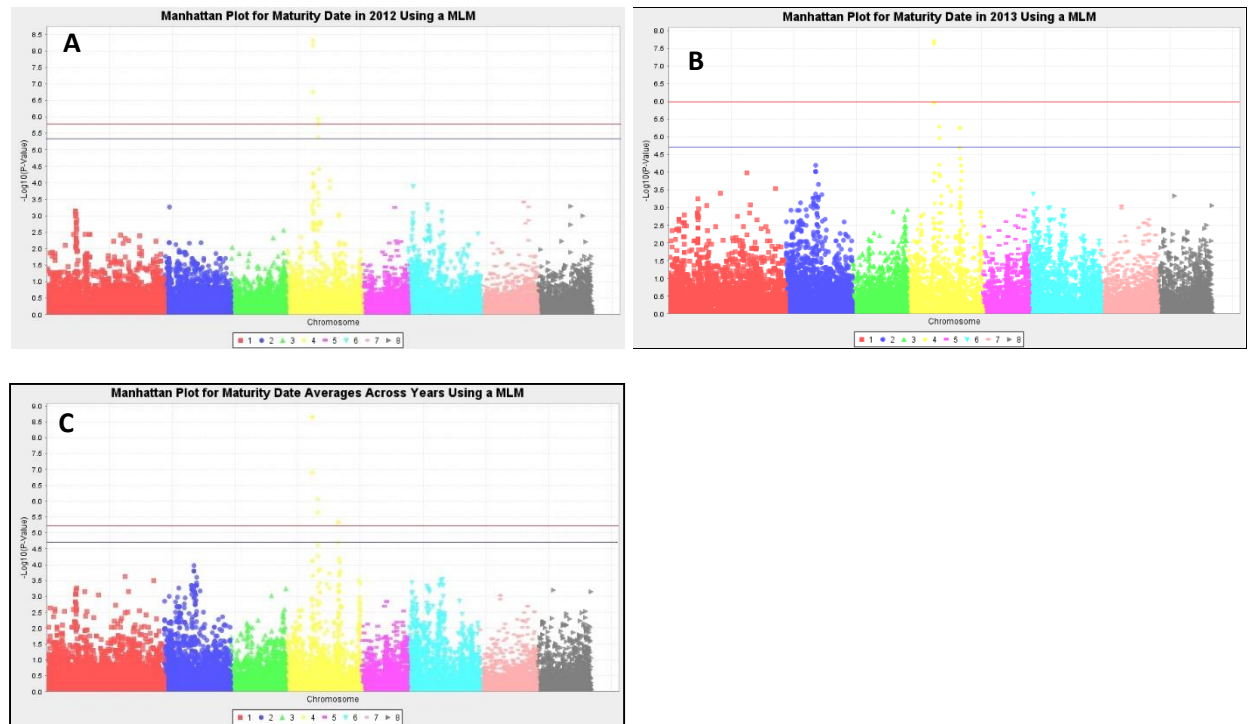

**Fig S2.** Manhattan plots for maturity date best linear unbiased predictors (BLUPs) (A) in 2012 using a MLM, (B) in 2013 using a MLM and (C) averages across years using a MLM. Red and blue lines represent significance thresholds at  $P < 0.01$  and  $P < 0.05$ , respectively using a Benjamini-Hochberg false discovery rate adjustment.

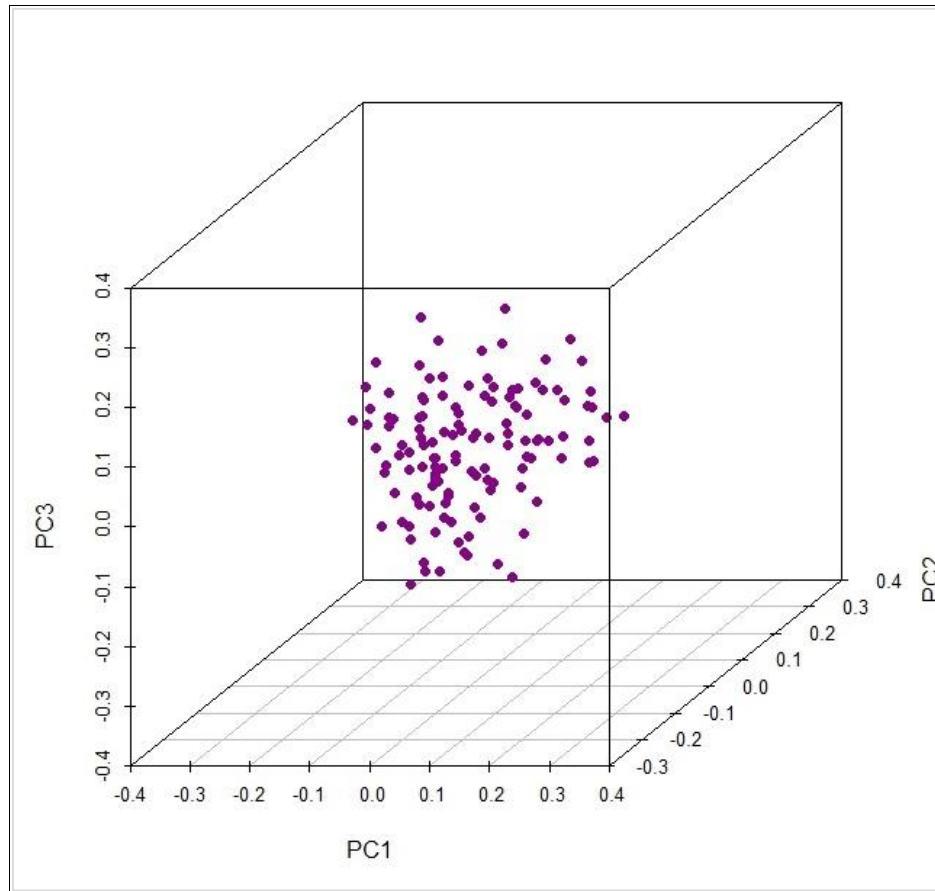

**Fig S3.** Multi dimensional scaling plot of the study population. Principle components were generated using the HapMap file produced from the GBS sequencing data. PC1-3, principle components 1-3.
